# Supplementary material for: Exercise for osteoarthritis of the knee: a Cochrane systematic review
Source: HighWire-hosted journal article supplement (doi:10.1136/bjsports-2015-095424), 2015-09-24

Supplementary Table 1 Forest plot of comparison: immediate post-treatment outcome on pain.

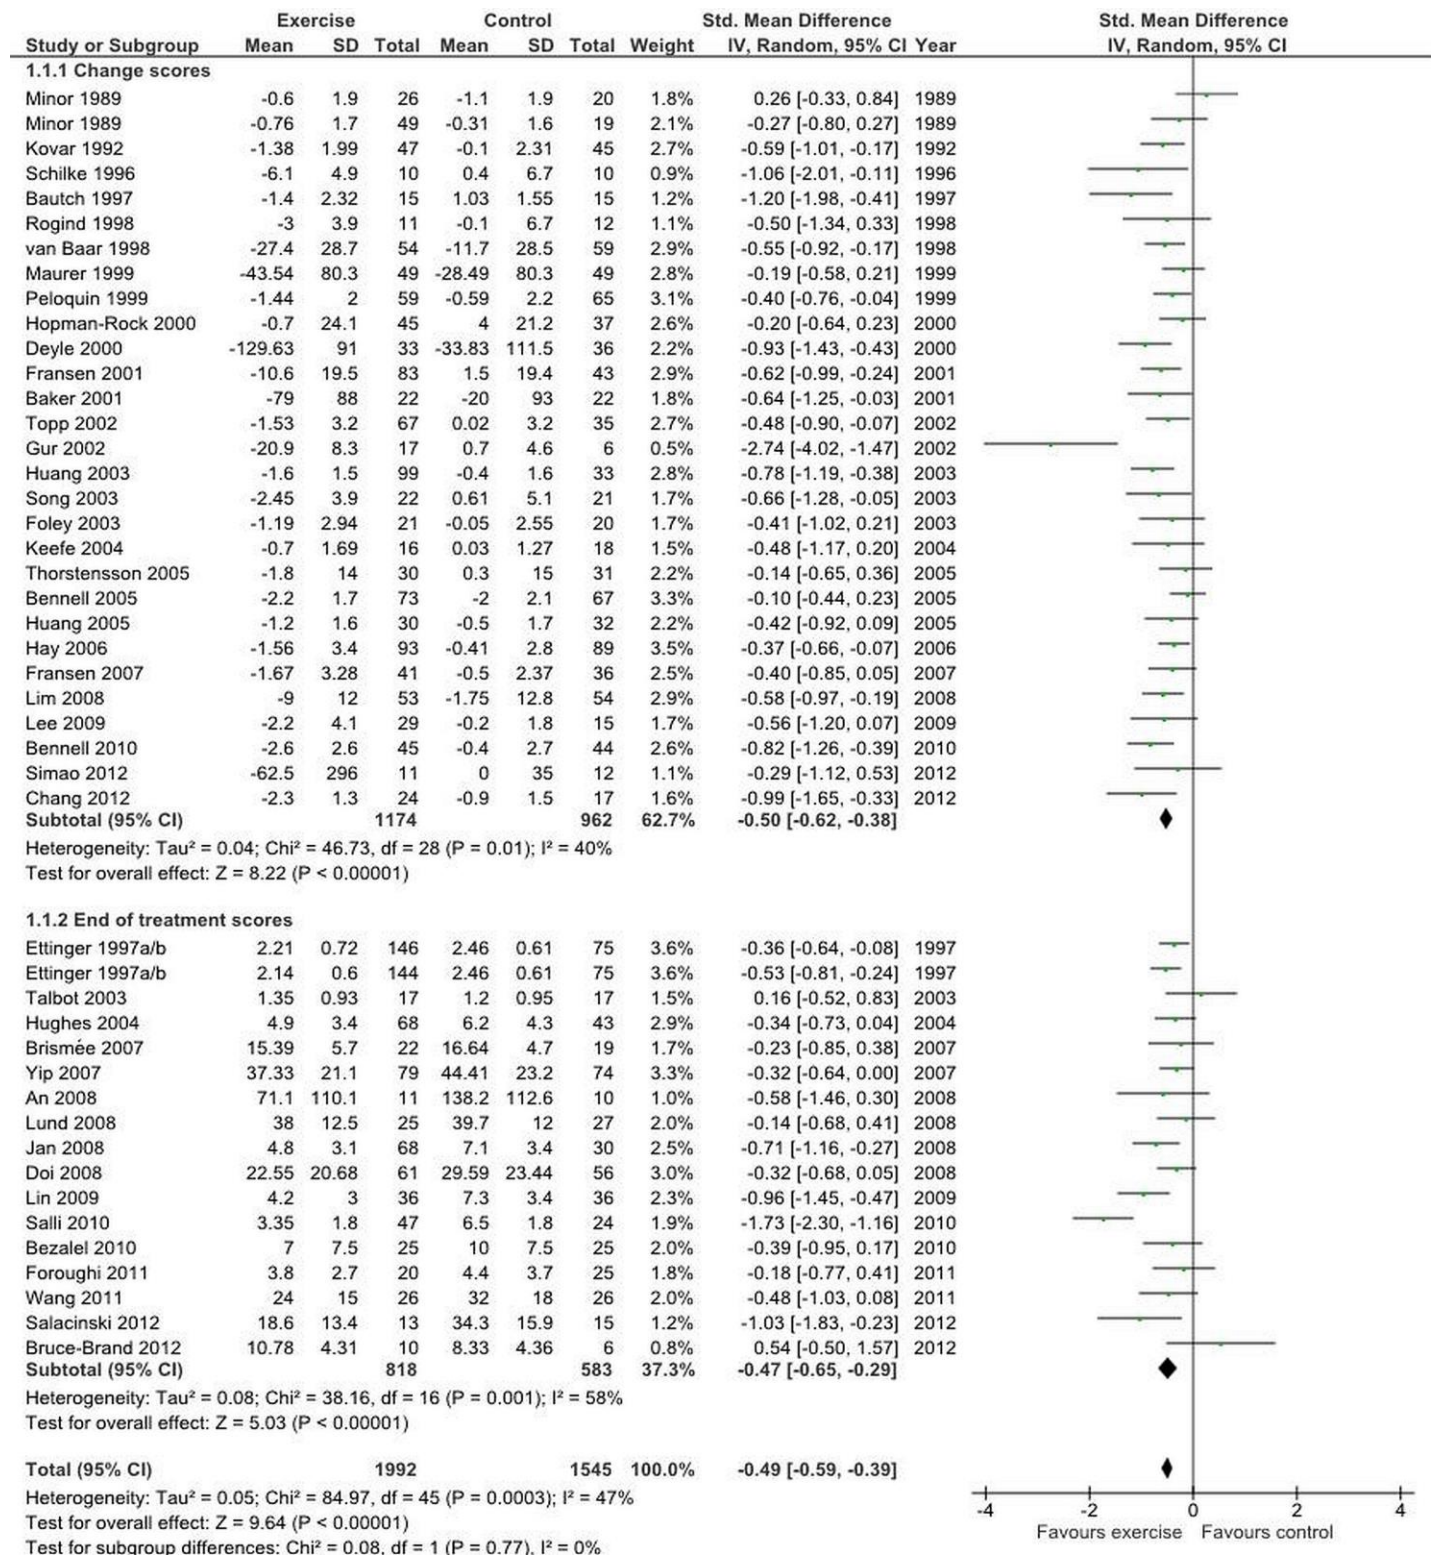

Supplementary Table 2. Forest plot of comparison: immediate post-treatment outcome on physical function

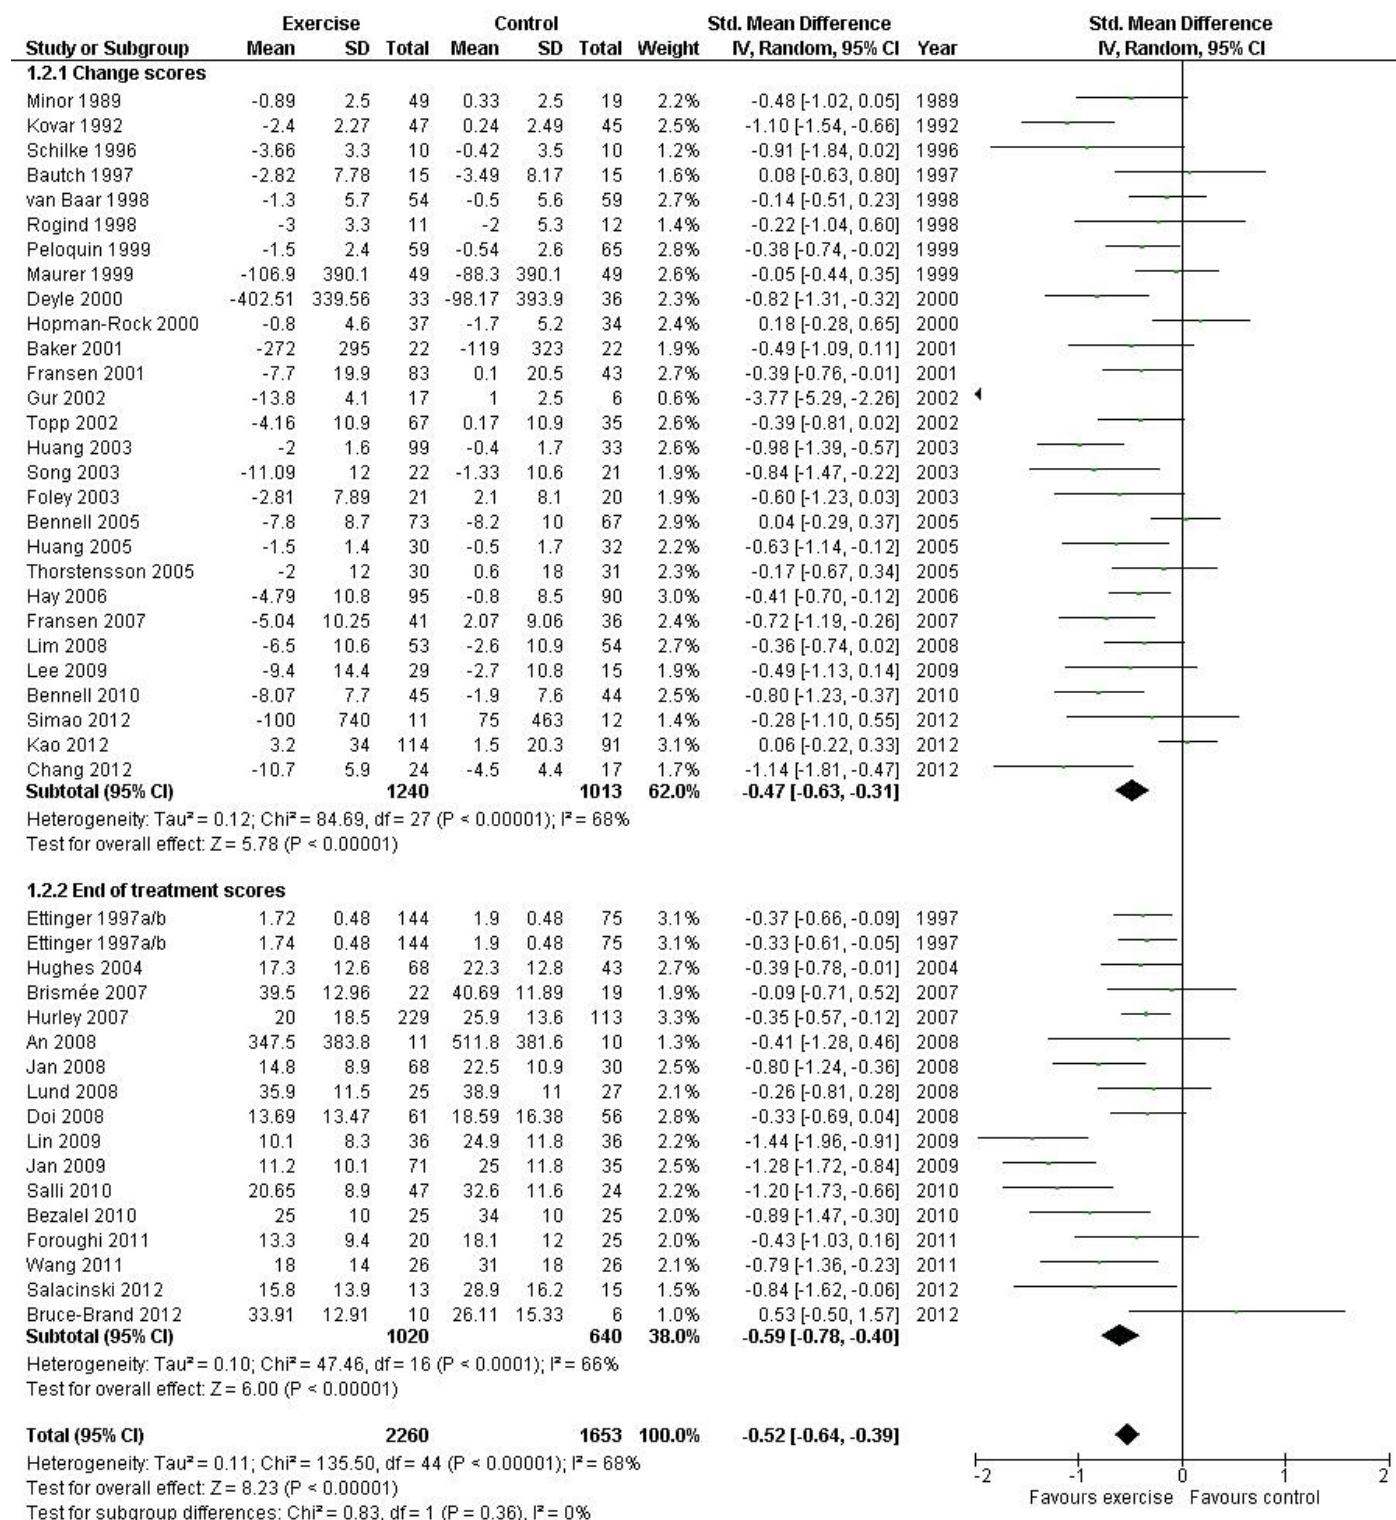

Supplementary Table 3 Forest plot of comparison: immediate post-treatment outcome on quality of life.

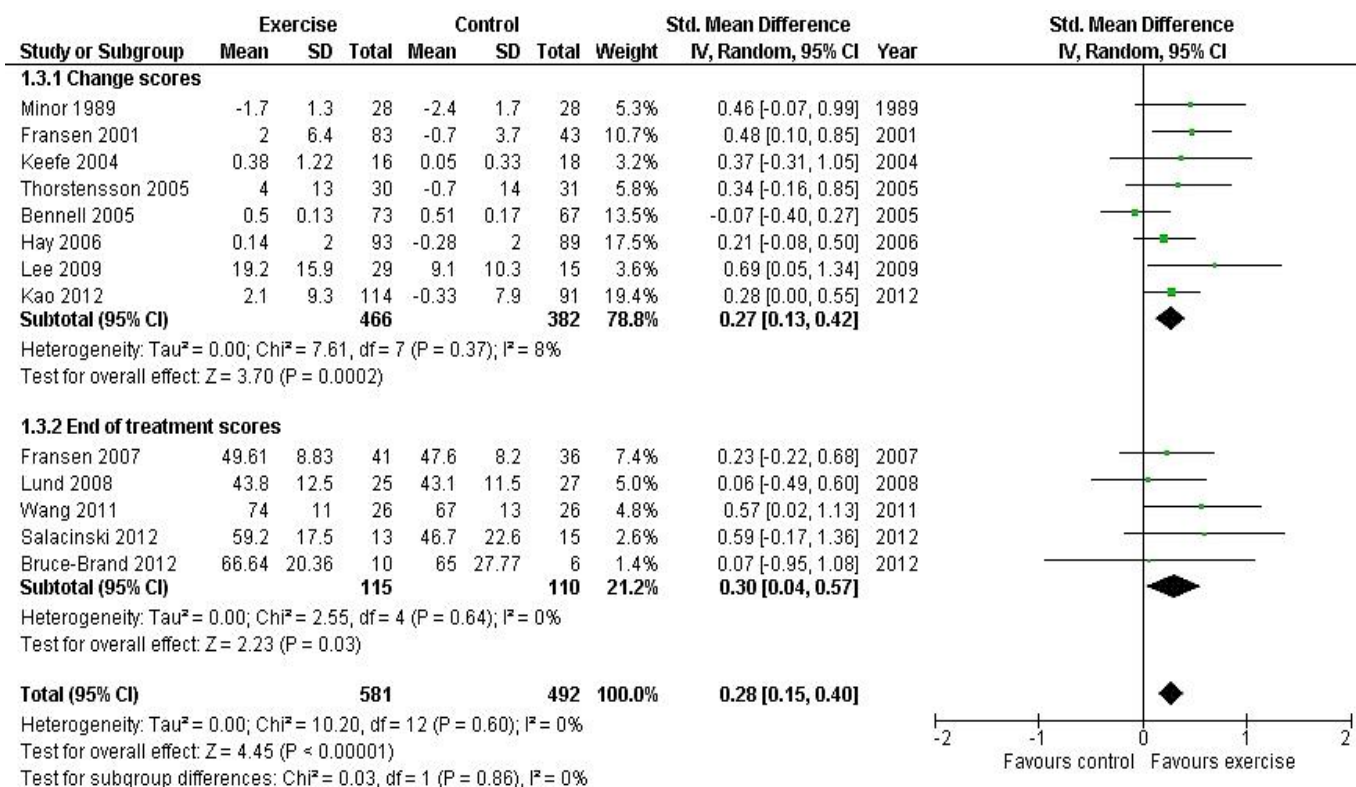

Supplement: bjsports-2015-095424supp_tables.pdf [file bjsports-2015-095424supp_tables.pdf]
