# Supplementary material for: Exercise for osteoarthritis of the knee: a Cochrane systematic review
Source: HighWire-hosted journal article supplement (doi:10.1136/bjsports-2015-095424), 2015-09-24
Supplement: bjsports-2015-095424supp_tables.pdf [file bjsports-2015-095424supp_tables.pdf]

## Supplementary Appendix

Improving life expectancy: how many years behind has the USA fallen?  
A cross-national comparison among high-income countries from 1958 to 2007

by

Stéphane Verguet & Dean T Jamison

**Table A.1.** Evolution of male life expectancy for the US, and sixteen other high-income countries, 1958-67 to 1998-2007

**Table A.2.** Evolution of female life expectancy for the US, and sixteen other high-income countries, 1958-67 to 1998-2007

**Table A.3.** Evolution of male 15q0 for the US, and sixteen other high-income countries, 1958-67 to 1998-2007

**Table A.4.** Evolution of female 15q0 for the US, and sixteen other high-income countries, 1958-67 to 1998-2007

**Table A.5.** Evolution of male 35q15 for the US, and sixteen other high-income countries, 1958-67 to 1998-2007

**Table A.6.** Evolution of female 35q15 for the US, and sixteen other high-income countries, 1958-67 to 1998-2007

**Figure A.1.** Evolution of years behind the average of sixteen comparator high-income countries for US life expectancy, males and females, 1958-2007

**Figure A.2.** Evolution of years behind the average of sixteen comparator high-income countries for US mortality rates across age groups, males and females, early 1960s and early 2000s

**Figure A.3.** Evolution of years behind the average of sixteen comparator high-income countries for US mortality rates in the 0-14 age group, males and females, 1958-2007

**Figure A.4.** Evolution of years behind the average of sixteen comparator high-income countries for US mortality rates in the 15-49 age group, males and females, 1958-2007

**Figure A.5.** Gap in life expectancy between the US and the leader, and between the US and the average of sixteen comparator high-income countries, males and females, 1958-2007

**Figure A.6.** Gap in mortality rates in the 0-14 age group between the US and the leader, and between the US and the average of sixteen comparator high-income countries, males and females, 1958-2007

**Figure A.7.** Gap in mortality rates in the 15-49 age group between the US and the leader, and between the US and the average of sixteen comparator high-income countries, males and females, 1958-2007

**Figure A.8.** Evolution of life expectancy for the leader, the US, and the average of sixteen comparator high-income countries, males and females, 1958-2007

**Figure A.9.** Evolution of mortality rates (per 100,000) for diseases of the circulatory system and ischemic heart disease for the US, and the average of sixteen comparator high-income countries, males and females, 1960-2010

**Table A.1.** Evolution of male life expectancy for the US, and sixteen other high-income countries, 1958-67 to 1998-2007

| Life expectancy (years) | 1958-67                                                                                                                                                             | 1966-77                                                                                                                                 | 1978-87                                                                                                                                                                                         | 1988-97                                                                                                                                                                                                                     | 1998-07                                                                                                                                                                                         |
|-------------------------|---------------------------------------------------------------------------------------------------------------------------------------------------------------------|-----------------------------------------------------------------------------------------------------------------------------------------|-------------------------------------------------------------------------------------------------------------------------------------------------------------------------------------------------|-----------------------------------------------------------------------------------------------------------------------------------------------------------------------------------------------------------------------------|-------------------------------------------------------------------------------------------------------------------------------------------------------------------------------------------------|
| Above 80                |                                                                                                                                                                     |                                                                                                                                         |                                                                                                                                                                                                 |                                                                                                                                                                                                                             |                                                                                                                                                                                                 |
| 75 to 80                |                                                                                                                                                                     |                                                                                                                                         |                                                                                                                                                                                                 | JPN (76.3)                                                                                                                                                                                                                  | JPN (78.2)<br>AUS (77.9)<br>SWE (77.9)<br>CHE (77.9)<br>ITA (77.3)<br>CAN (77.2)<br>NOR (76.8)<br>ESP (76.4)<br>NLD (76.4)<br>UK (76.1)<br>FRA (76.0)<br>DEU (76.0)<br>AUT (75.9)<br>DNK (75.0) |
| 70 to 75                | SWE (71.6)<br>NLD (71.2)<br>NOR (71.2)<br>DNK (70.4)                                                                                                                | SWE (72.1)<br>NOR (71.4)<br>NLD (71.3)<br>DNK (71.0)<br>CHE (70.8)<br>JPN (70.7)                                                        | JPN (74.2)<br>SWE (73.4)<br>CHE (72.9)<br>NLD (72.8)<br>ESP (72.7)<br>NOR (72.5)<br>CAN (72.4)<br>AUS (71.8)<br>ITA (71.6)<br>DNK (71.5)<br>UK (71.1)<br>FRA (70.8)<br>DEU (70.7)<br>USA (70.7) | SWE (75.5)<br>CHE (74.8)<br>AUS (74.6)<br>CAN (74.6)<br>NLD (74.2)<br>NOR (74.2)<br>ITA (74.2)<br>ESP (74.0)<br>UK (73.5)<br>FRA (73.3)<br>DEU (73.2)<br>AUT (72.8)<br>DNK (72.6)<br>USA (72.3)<br>FIN (72.0)<br>PRT (71.3) | FIN (74.8)<br>USA (74.7)<br>PRT (74.1)                                                                                                                                                          |
| 65 to 70                | CHE (68.9)<br>CAN (68.4)<br>UK (68.1)<br>AUS (67.8)<br>ESP (67.4)<br>FRA (67.3)<br>ITA (67.2)<br>DEU (67.2)<br>USA (66.8)<br>JPN (66.7)<br>AUT (66.2)<br>FIN (65.5) | ESP (69.8)<br>CAN (69.7)<br>ITA (69.1)<br>UK (69.1)<br>FRA (68.6)<br>AUS (68.5)<br>DEU (67.9)<br>USA (67.8)<br>AUT (67.3)<br>FIN (66.7) | FIN (69.9)<br>AUT (69.7)<br>PRT (69.0)                                                                                                                                                          |                                                                                                                                                                                                                             |                                                                                                                                                                                                 |
| Below 65                | PRT (61.6)                                                                                                                                                          | PRT (64.9)                                                                                                                              |                                                                                                                                                                                                 |                                                                                                                                                                                                                             |                                                                                                                                                                                                 |

AUS = Australia, AUT = Austria, CAN = Canada, CHE = Switzerland, DEU = West Germany, DNK = Denmark, ESP = Spain, FIN = Finland, FRA = France, ITA = Italy, JPN = Japan, NLD = Netherlands, NOR = Norway, PRT = Portugal, SWE = Sweden, UK = United Kingdom, USA = United States.

Source: Human Mortality Database.

**Table A.2.** Evolution of female life expectancy for the US, and sixteen other high-income countries, 1958-67 to 1998-2007

| Life expectancy (years) | 1958-67                                                                                                                                                                           | 1968-77                                                                                                                                                                                         | 1978-87                                                                                                                                                                                                                                   | 1988-97                                                                                                                                  | 1998-07                                                                                                                                                                                                       |
|-------------------------|-----------------------------------------------------------------------------------------------------------------------------------------------------------------------------------|-------------------------------------------------------------------------------------------------------------------------------------------------------------------------------------------------|-------------------------------------------------------------------------------------------------------------------------------------------------------------------------------------------------------------------------------------------|------------------------------------------------------------------------------------------------------------------------------------------|---------------------------------------------------------------------------------------------------------------------------------------------------------------------------------------------------------------|
| Above 80                |                                                                                                                                                                                   |                                                                                                                                                                                                 |                                                                                                                                                                                                                                           | JPN (82.5)<br>FRA (81.4)<br>CHE (81.4)<br>ESP (81.2)<br>SWE (80.9)<br>CAN (80.8)<br>ITA (80.8)<br>AUS (80.6)<br>NLD (80.2)<br>NOR (80.2) | JPN (85.1)<br>FRA (83.3)<br>CHE (83.2)<br>ESP (83.2)<br>ITA (83.1)<br>AUS (82.9)<br>SWE (82.4)<br>CAN (82.2)<br>NOR (81.9)<br>FIN (81.8)<br>AUT (81.7)<br>DEU (81.6)<br>NLD (81.1)<br>PRT (80.9)<br>UK (80.7) |
| 75 to 80                | NOR (76.1)<br>NLD (75.8)<br>SWE (75.6)                                                                                                                                            | NOR (77.6)<br>SWE (77.5)<br>NLD (77.2)<br>CHE (77.0)<br>CAN (76.8)<br>DNK (76.4)<br>FRA (76.3)<br>JPN (75.9)<br>ESP (75.5)<br>USA (75.5)<br>AUS (75.4)<br>UK (75.3)<br>ITA (75.2)<br>FIN (75.1) | JPN (79.8)<br>CHE (79.6)<br>SWE (79.4)<br>NLD (79.4)<br>CAN (79.3)<br>NOR (79.2)<br>ESP (79.0)<br>FRA (79.0)<br>AUS (78.6)<br>FIN (78.3)<br>ITA (78.2)<br>USA (77.9)<br>DNK (77.5)<br>DEU (77.3)<br>UK (77.0)<br>AUT (76.7)<br>PRT (75.9) | DEU (79.6)<br>FIN (79.6)<br>AUT (79.4)<br>USA (79.0)<br>UK (78.9)<br>PRT (78.5)<br>DNK (77.9)                                            | USA (79.9)<br>DNK (79.7)                                                                                                                                                                                      |
| 70 to 75                | CAN (74.6)<br>CHE (74.6)<br>DNK (74.5)<br>FRA (74.2)<br>AUS (74.2)<br>UK (74.1)<br>USA (73.6)<br>DEU (72.8)<br>FIN (72.6)<br>ITA (72.5)<br>AUT (72.5)<br>ESP (72.5)<br>JPN (71.7) | DEU (74.3)<br>AUT (74.2)<br>PRT (71.5)                                                                                                                                                          |                                                                                                                                                                                                                                           |                                                                                                                                          |                                                                                                                                                                                                               |
| 65 to 70                | PRT (67.5)                                                                                                                                                                        |                                                                                                                                                                                                 |                                                                                                                                                                                                                                           |                                                                                                                                          |                                                                                                                                                                                                               |

AUS = Australia, AUT = Austria, CAN = Canada, CHE = Switzerland, DEU = West Germany, DNK = Denmark, ESP = Spain, FIN = Finland, FRA = France, ITA = Italy, JPN = Japan, NLD = Netherlands, NOR = Norway, PRT = Portugal, SWE = Sweden, UK = United Kingdom, USA = United States.

Source: Human Mortality Database.

**Table A.3.** Evolution of male 15q0 for the US, and sixteen other high-income countries, 1958-67 to 1998-2007 (per 1,000 live births)

| 1958-67   | 1968-77  | 1978-87  | 1988-97  | 1998-07  |
|-----------|----------|----------|----------|----------|
| SWE (24)  | SWE (17) | SWE (11) | SWE (8)  | SWE (5)  |
| NLD (28)  | NLD (21) | FIN (12) | JPN (8)  | JPN (6)  |
| NOR (29)  | NOR (21) | JPN (12) | FIN (9)  | FIN (6)  |
| DNK (31)  | FIN (21) | DNK (14) | DEU (10) | NOR (6)  |
| AUS (31)  | DNK (21) | CHE (14) | NOR (10) | ITA (6)  |
| FIN (32)  | JPN (22) | NOR (14) | CHE (10) | DEU (7)  |
| UK (32)   | CHE (23) | NLD (14) | NLD (10) | AUT (7)  |
| CHE (33)  | FRA (25) | CAN (16) | CAN (11) | FRA (7)  |
| FRA (37)  | UK (26)  | FRA (16) | DNK (11) | ESP (7)  |
| USA (38)  | AUS (26) | AUS (17) | AUT (11) | DNK (7)  |
| CAN (39)  | CAN (27) | UK (17)  | FRA (11) | CHE (7)  |
| JPN (43)  | USA (28) | DEU (18) | AUS (11) | NLD (8)  |
| DEU (43)  | DEU (32) | ESP (18) | UK (11)  | AUS (8)  |
| AUT (47)  | ESP (34) | USA (19) | ESP (11) | CAN (8)  |
| ITA (56)  | AUT (34) | ITA (19) | ITA (11) | UK (8)   |
| ESP (59)  | ITA (36) | AUT (20) | USA (14) | PRT (9)  |
| PRT (116) | PRT (69) | PRT (33) | PRT (18) | USA (11) |

AUS = Australia, AUT = Austria, CAN = Canada, CHE = Switzerland, DEU = West Germany, DNK = Denmark, ESP = Spain, FIN = Finland, FRA = France, ITA = Italy, JPN = Japan, NLD = Netherlands, NOR = Norway, PRT = Portugal, SWE = Sweden, UK = United Kingdom, USA = United States.

Source: Human Mortality Database.

Note: 15q0 is defined as the probability of dying from birth through age 14 at then prevailing age-specific mortality rates.

**Table A.4.** Evolution of female 15q0 for the US, and sixteen other high-income countries, 1958-67 to 1998-2007 (per 1,000 live births)

| 1958-67   | 1968-77  | 1978-87  | 1988-97  | 1998-07 |
|-----------|----------|----------|----------|---------|
| SWE (18)  | SWE (13) | FIN (9)  | SWE (6)  | SWE (4) |
| NLD (21)  | NOR (15) | SWE (9)  | JPN (7)  | FIN (5) |
| NOR (21)  | DNK (15) | JPN (9)  | FIN (7)  | JPN (5) |
| DNK (22)  | FIN (15) | CHE (10) | NOR (8)  | NOR (5) |
| FIN (24)  | NLD (15) | DNK (10) | DEU (8)  | FRA (5) |
| AUS (24)  | JPN (16) | NOR (11) | CHE (8)  | ITA (6) |
| CHE (24)  | CHE (17) | NLD (11) | NLD (8)  | DEU (6) |
| UK (25)   | FRA (19) | FRA (12) | FRA (8)  | AUT (6) |
| FRA (29)  | UK (19)  | CAN (12) | DNK (8)  | DNK (6) |
| USA (29)  | AUS (20) | AUS (13) | CAN (8)  | CHE (6) |
| CAN (30)  | CAN (20) | UK (13)  | AUT (9)  | ESP (6) |
| DEU (33)  | USA (21) | DEU (13) | UK (9)   | NLD (6) |
| JPN (34)  | DEU (24) | ESP (14) | AUS (9)  | AUS (6) |
| AUT (37)  | AUT (25) | USA (14) | ESP (9)  | UK (7)  |
| ITA (47)  | ESP (26) | AUT (15) | ITA (9)  | CAN (7) |
| ESP (47)  | ITA (28) | ITA (15) | USA (11) | PRT (7) |
| PRT (100) | PRT (55) | PRT (25) | PRT (13) | USA (9) |

AUS = Australia, AUT = Austria, CAN = Canada, CHE = Switzerland, DEU = West Germany, DNK = Denmark, ESP = Spain, FIN = Finland, FRA = France, ITA = Italy, JPN = Japan, NLD = Netherlands, NOR = Norway, PRT = Portugal, SWE = Sweden, UK = United Kingdom, USA = United States.

Source: Human Mortality Database.

Note: 15q0 is defined as the probability of dying from birth through age 14 at then prevailing age-specific mortality rates.

**Table A.5.** Evolution of male 35q15 for the US, and sixteen other high-income countries, 1958-67 to 1998-2007 (per 1,000)

| 1958-67   | 1968-77   | 1978-87  | 1988-97  | 1998-07  |
|-----------|-----------|----------|----------|----------|
| NLD (59)  | NLD (60)  | NLD (50) | JPN (44) | SWE (36) |
| SWE (62)  | SWE (66)  | JPN (55) | NLD (44) | NLD (37) |
| DNK (63)  | NOR (66)  | UK (57)  | SWE (47) | JPN (40) |
| NOR (66)  | UK (67)   | SWE (59) | UK (51)  | CHE (41) |
| UK (71)   | DNK (68)  | NOR (61) | NOR (53) | ITA (41) |
| CHE (78)  | CHE (69)  | ITA (61) | AUS (55) | CAN (44) |
| ESP (79)  | ESP (67)  | CHE (62) | CAN (56) | NOR (45) |
| ITA (79)  | JPN (73)  | ESP (64) | ITA (56) | AUS (46) |
| CAN (84)  | ITA (75)  | AUS (66) | CHE (60) | DEU (46) |
| DEU (85)  | CAN (84)  | CAN (66) | DEU (60) | UK (47)  |
| AUS (87)  | AUS (84)  | DNK (69) | DNK (64) | AUT (50) |
| AUT (94)  | DEU (87)  | DEU (73) | AUT (69) | DNK (52) |
| JPN (95)  | AUT (97)  | FIN (85) | ESP (72) | ESP (53) |
| FRA (97)  | FRA (97)  | USA (87) | FRA (79) | FRA (62) |
| USA (105) | PRT (104) | FRA (87) | FIN (81) | FIN (64) |
| PRT (106) | USA (106) | AUT (87) | USA (85) | USA (71) |
| FIN (115) | FIN (113) | PRT (93) | PRT (90) | PRT (76) |

AUS = Australia, AUT = Austria, CAN = Canada, CHE = Switzerland, DEU = West Germany, DNK = Denmark, ESP = Spain, FIN = Finland, FRA = France, ITA = Italy, JPN = Japan, NLD = Netherlands, NOR = Norway, PRT = Portugal, SWE = Sweden, UK = United Kingdom, USA = United States.

Source: Human Mortality Database.

Note: 35q15 is defined as the probability of dying from age 15 through age 49 at then prevailing age-specific mortality rates.

**Table A.6.** Evolution of female 35q15 for the US, and sixteen other high-income countries, 1958-67 to 1998-2007 (per 1,000)

| 1958-67  | 1968-77  | 1978-87  | 1988-97  | 1998-07  |
|----------|----------|----------|----------|----------|
| NOR (34) | NOR (31) | NOR (28) | JPN (23) | ITA (20) |
| NLD (37) | CHE (35) | JPN (28) | ITA (25) | JPN (20) |
| SWE (39) | NLD (36) | ESP (29) | SWE (26) | SWE (20) |
| CHE (41) | SWE (36) | ITA (29) | NOR (27) | CHE (21) |
| DNK (45) | ITA (39) | NLD (30) | AUS (27) | ESP (22) |
| CAN (46) | ESP (39) | SWE (30) | ESP (27) | AUS (23) |
| UK (46)  | FIN (40) | FIN (31) | CAN (28) | AUT (24) |
| ITA (48) | JPN (42) | CHE (31) | CHE (28) | NOR (24) |
| FIN (50) | UK (42)  | AUS (33) | NLD (28) | DEU (24) |
| DEU (51) | CAN (43) | CAN (34) | UK (29)  | CAN (24) |
| AUT (51) | DNK (44) | UK (34)  | FIN (30) | NLD (26) |
| AUS (51) | AUT (45) | DEU (36) | DEU (31) | UK (26)  |
| ESP (51) | FRA (46) | FRA (37) | AUT (31) | FIN (26) |
| FRA (51) | AUS (46) | AUT (38) | FRA (32) | FRA (27) |
| PRT (59) | DEU (46) | PRT (41) | PRT (36) | DNK (28) |
| USA (59) | PRT (50) | DNK (41) | DNK (37) | PRT (29) |
| JPN (65) | USA (55) | USA (42) | USA (39) | USA (37) |

AUS = Australia, AUT = Austria, CAN = Canada, CHE = Switzerland, DEU = West Germany, DNK = Denmark, ESP = Spain, FIN = Finland, FRA = France, ITA = Italy, JPN = Japan, NLD = Netherlands, NOR = Norway, PRT = Portugal, SWE = Sweden, UK = United Kingdom, USA = United States.

Source: Human Mortality Database.

Note: 35q15 is defined as the probability of dying from age 15 through age 49 at then prevailing age-specific mortality rates.



**Figure A.1.** Evolution of years behind the average of sixteen comparator high-income countries for US life expectancy, males and females, 1958-2007

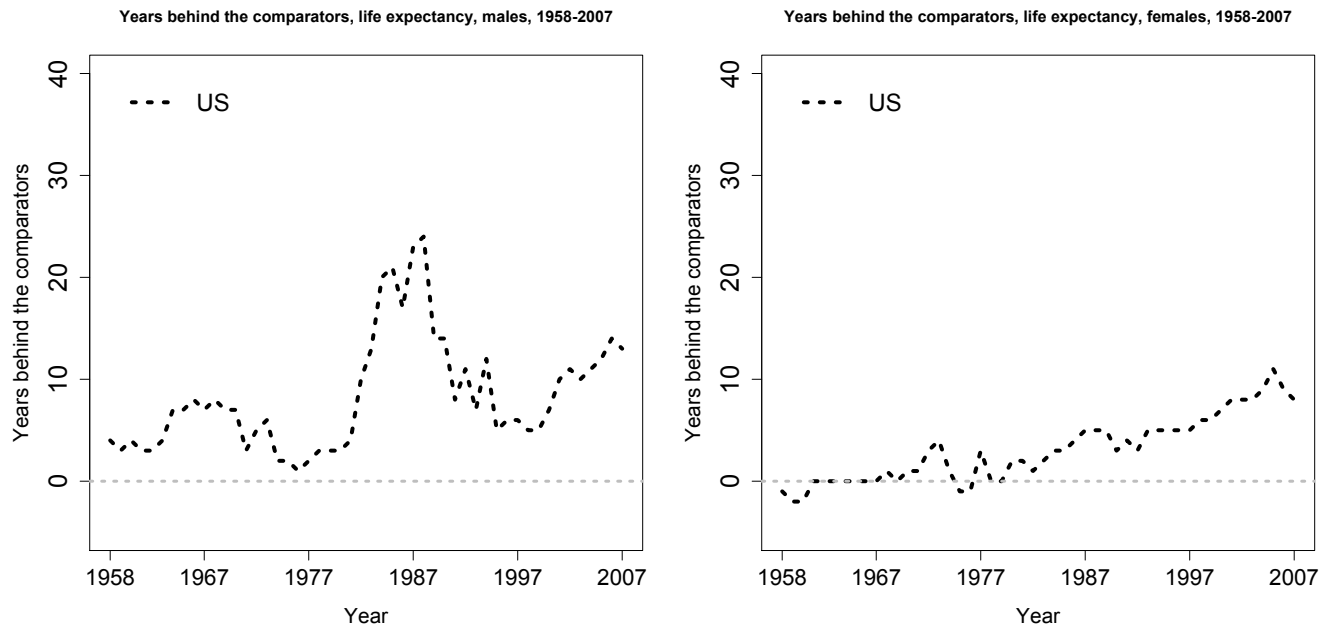

**Figure A.2.** Evolution of years behind the average of sixteen comparator high-income countries for US mortality rates across age groups, males and females, early 1960s and early 2000s

(a) Males

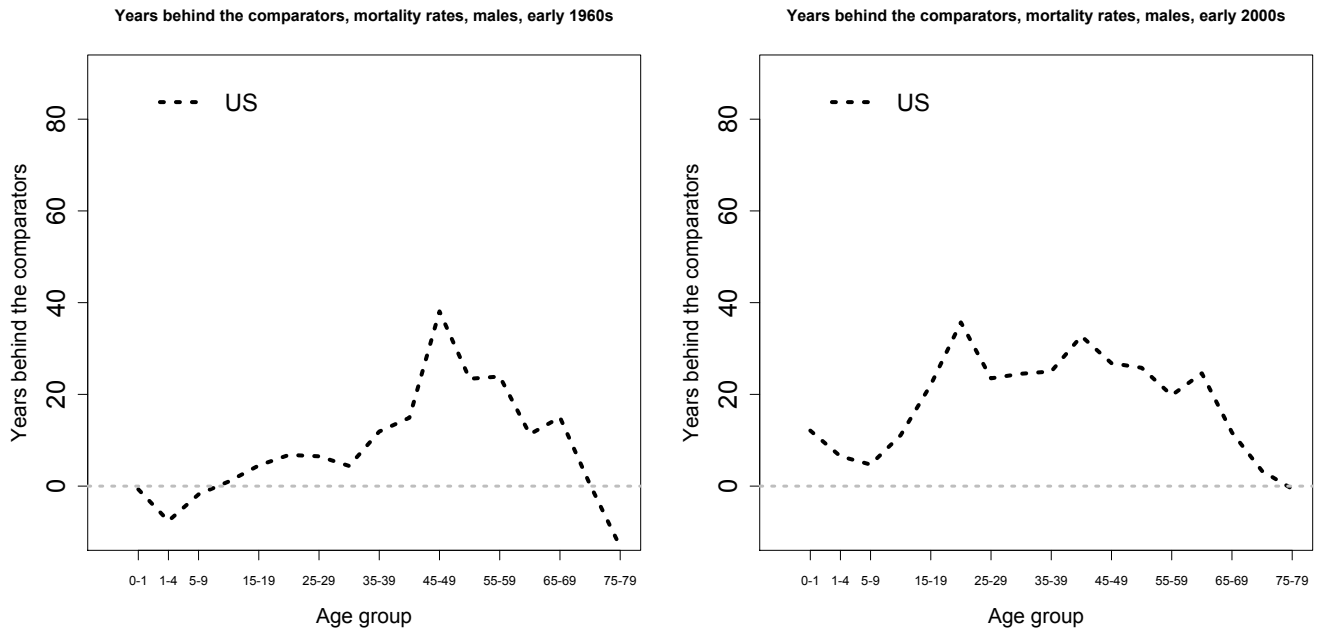

(b) Females

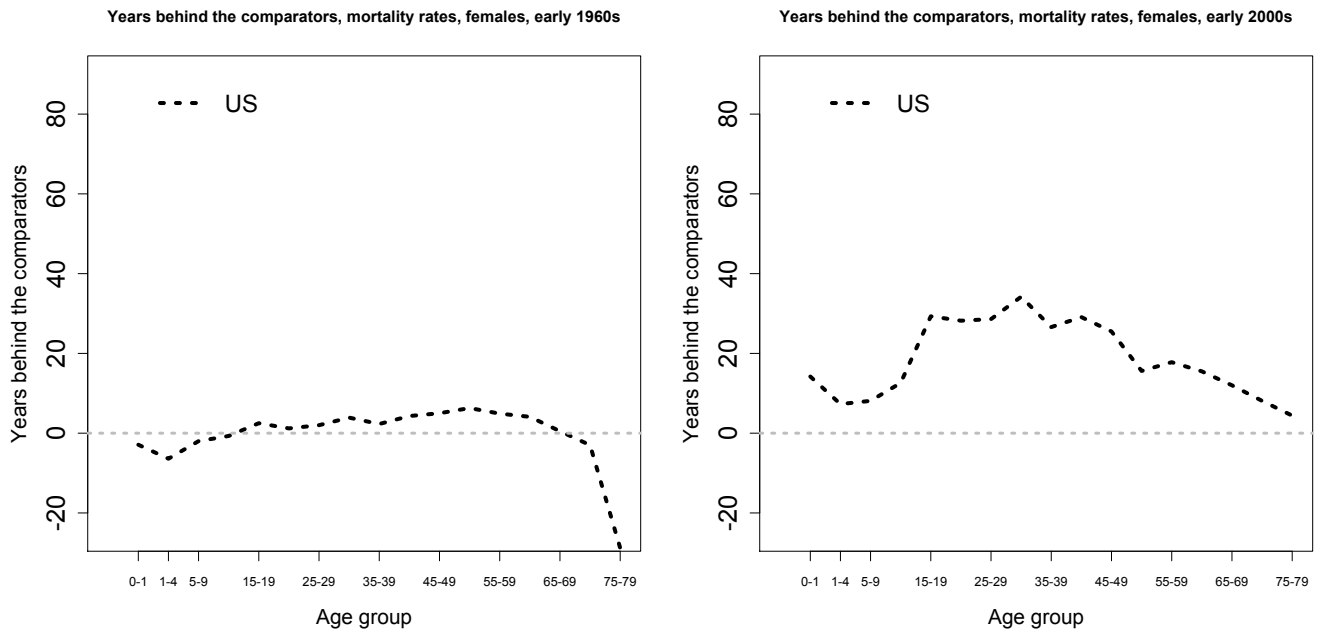

Note: Early 1960s refers to the period 1958-67 and early 2000s refers to 1998-2007.

**Figure A.3.** Evolution of years behind the average of sixteen comparator high-income countries for US mortality rates in the 0-14 age group, males and females, 1958-2007

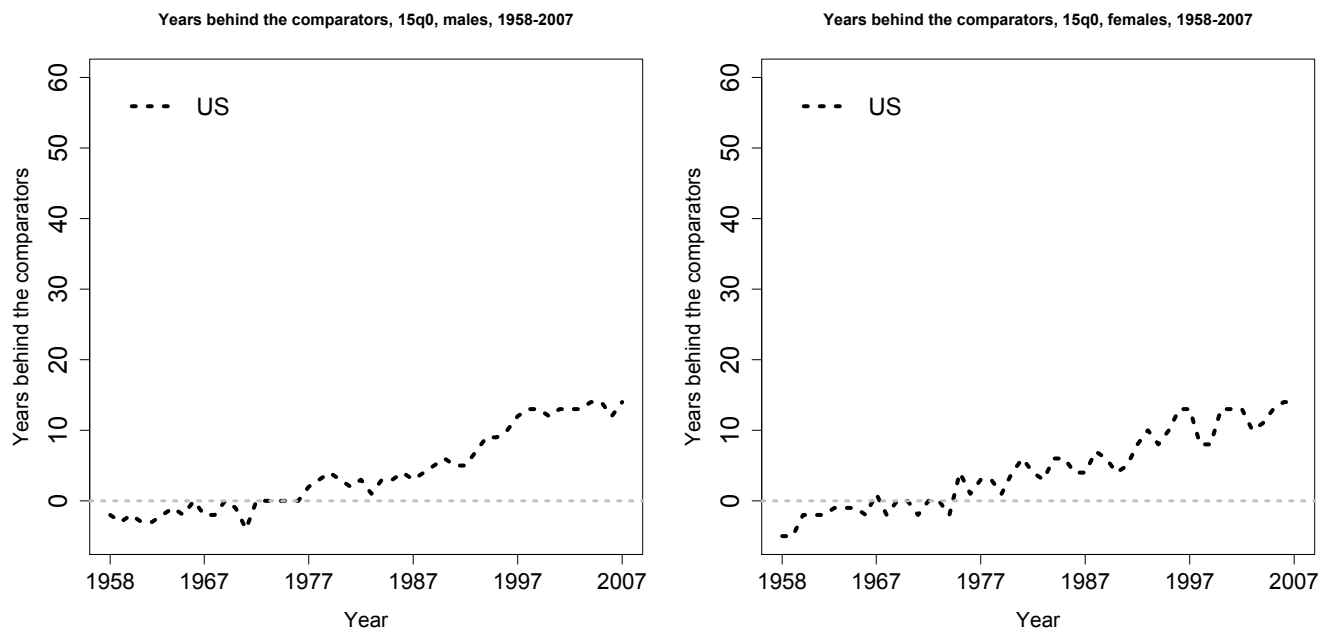

Note: 15q0 is defined as the probability of dying from birth through age 14 at then prevailing age-specific mortality rates.

**Figure A.4.** Evolution of years behind the average of sixteen comparator high-income countries for US mortality rates in the 15-49 age group, males and females, 1958-2007

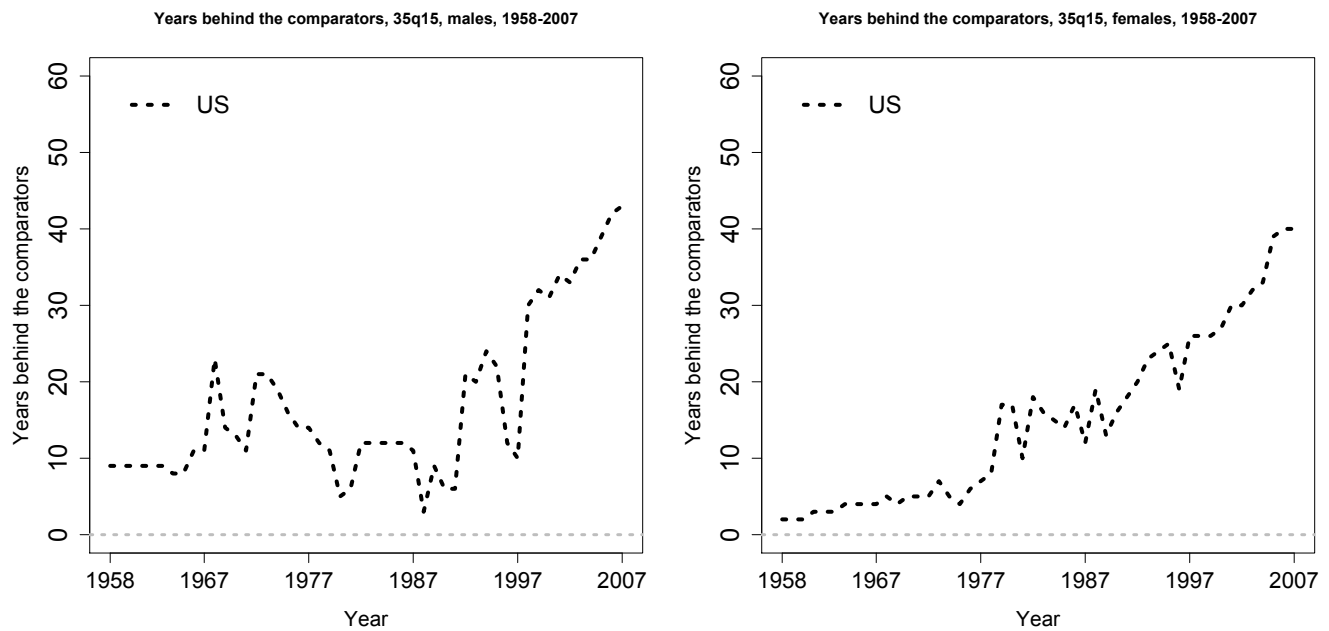

Note: 35q15 is defined as the probability of dying from age 15 through age 49 at then prevailing age-specific mortality rates.

**Figure A.5.** Gap in life expectancy between the US and the leader, and between the US and the average of sixteen comparator high-income countries, males and females, 1958-2007

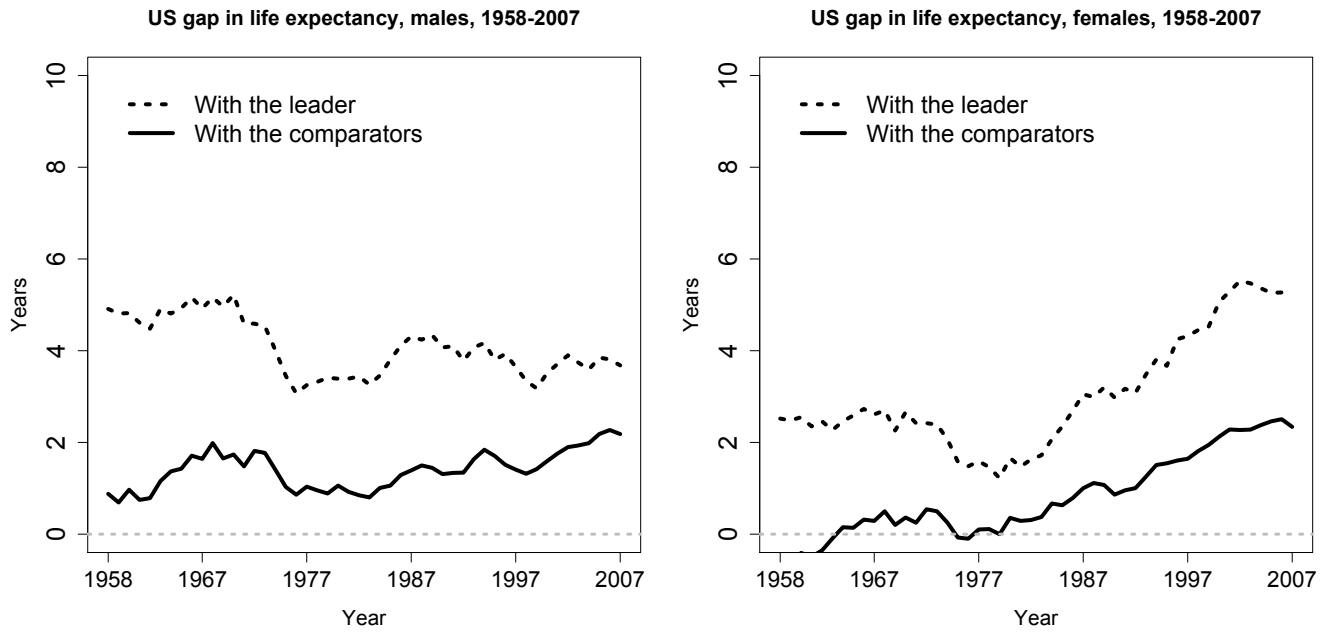

**Figure A.6.** Gap in mortality rates in the 0-14 age group between the US and the leader, and between the US and the average of sixteen comparator high-income countries, males and females, 1958-2007

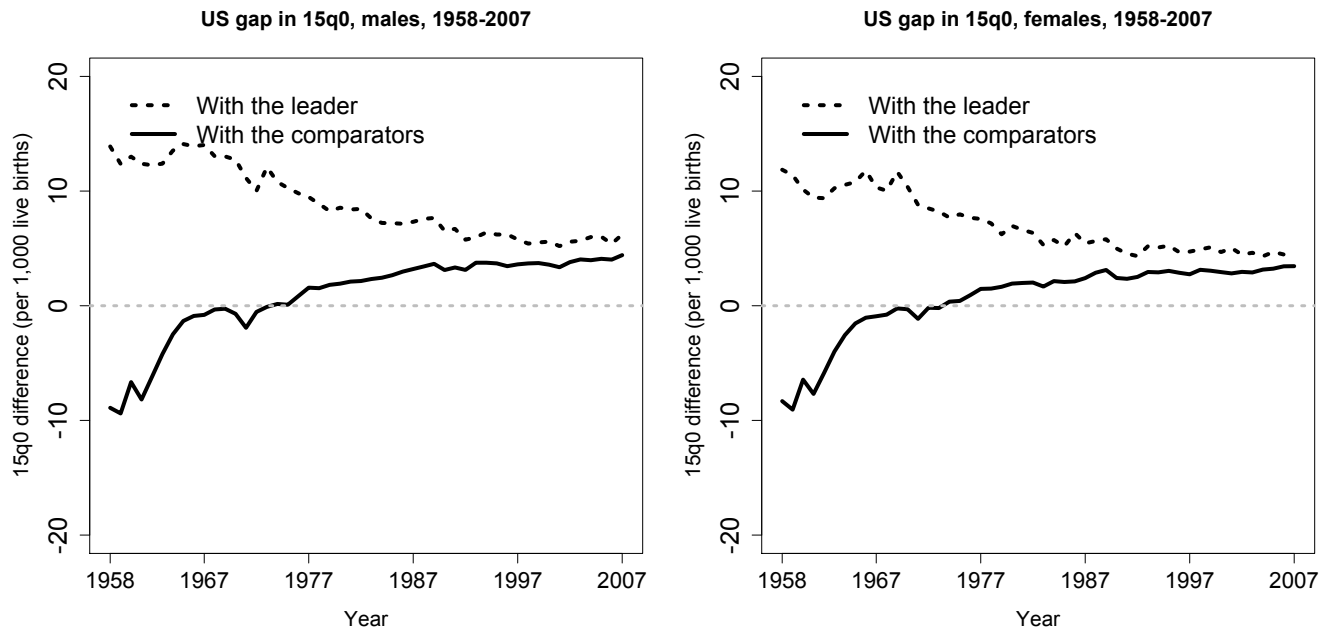

Note: 15q0 is defined as the probability of dying from birth through age 14 at then prevailing age-specific mortality rates.

**Figure A.7.** Gap in mortality rates in the 15-49 age group between the US and the leader, and between the US and the average of sixteen comparator high-income countries, males and females, 1958-2007

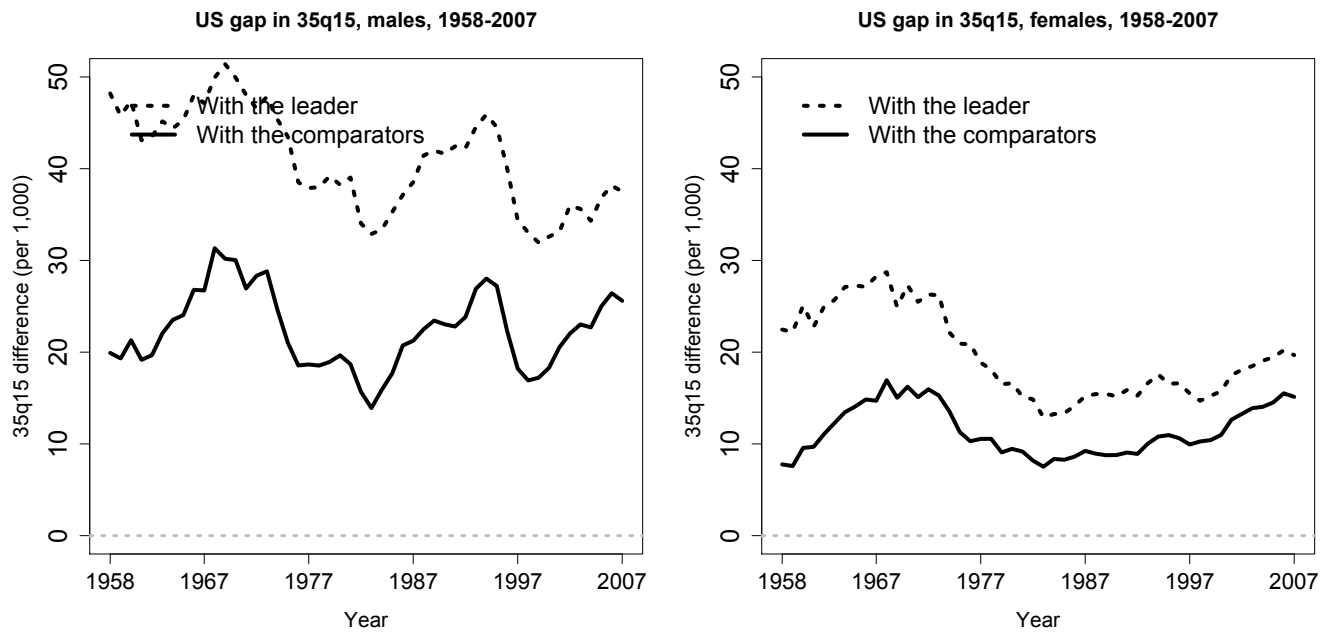

Note: 35q15 is defined as the probability of dying from age 15 through age 49 at then prevailing age-specific mortality rates.

**Figure A.8.** Evolution of life expectancy for the leader, the US, and the average of sixteen comparator high-income countries, males and females, 1958-2007

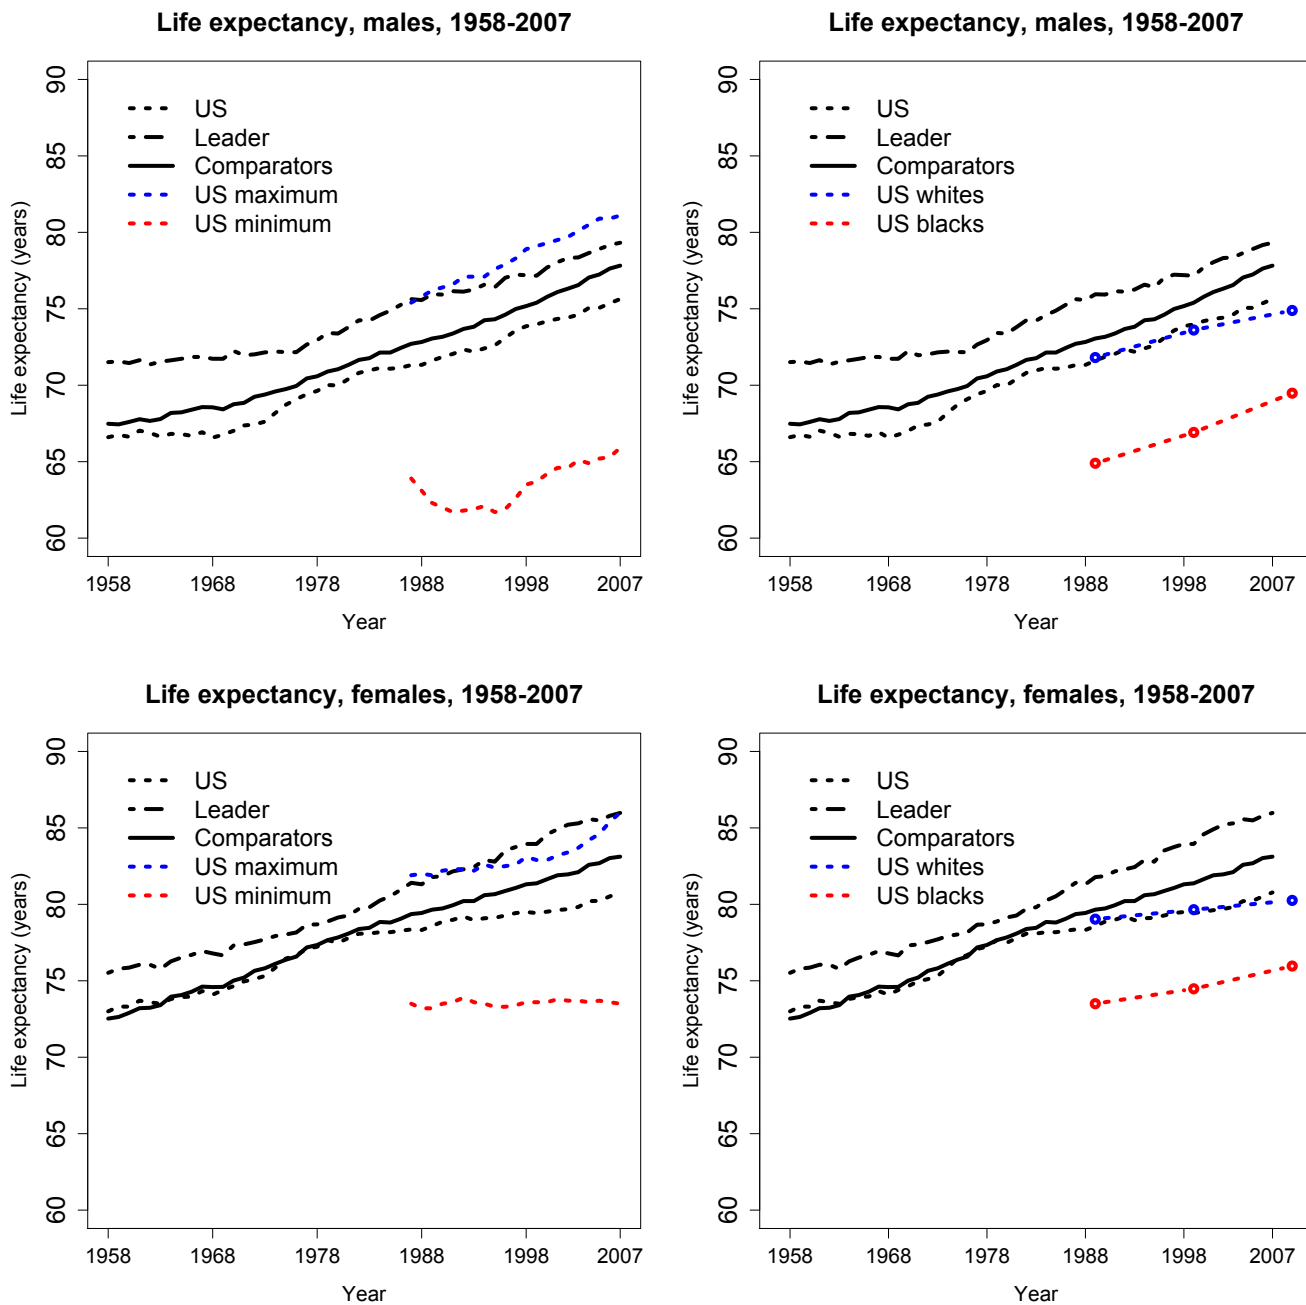

US maximum = maximum life expectancy (by county); US minimum = minimum life expectancy (by county); US whites = average life expectancy for white individuals (by county); US blacks = average life expectancy for black individuals (by county).

Source: Institute for Health Metrics and Evaluation, University of Washington.



**Figure A.9.** Evolution of mortality rates (per 100,000) for diseases of the circulatory system and ischemic heart disease for the US and the average of sixteen comparator high-income countries, males and females, 1960-2010

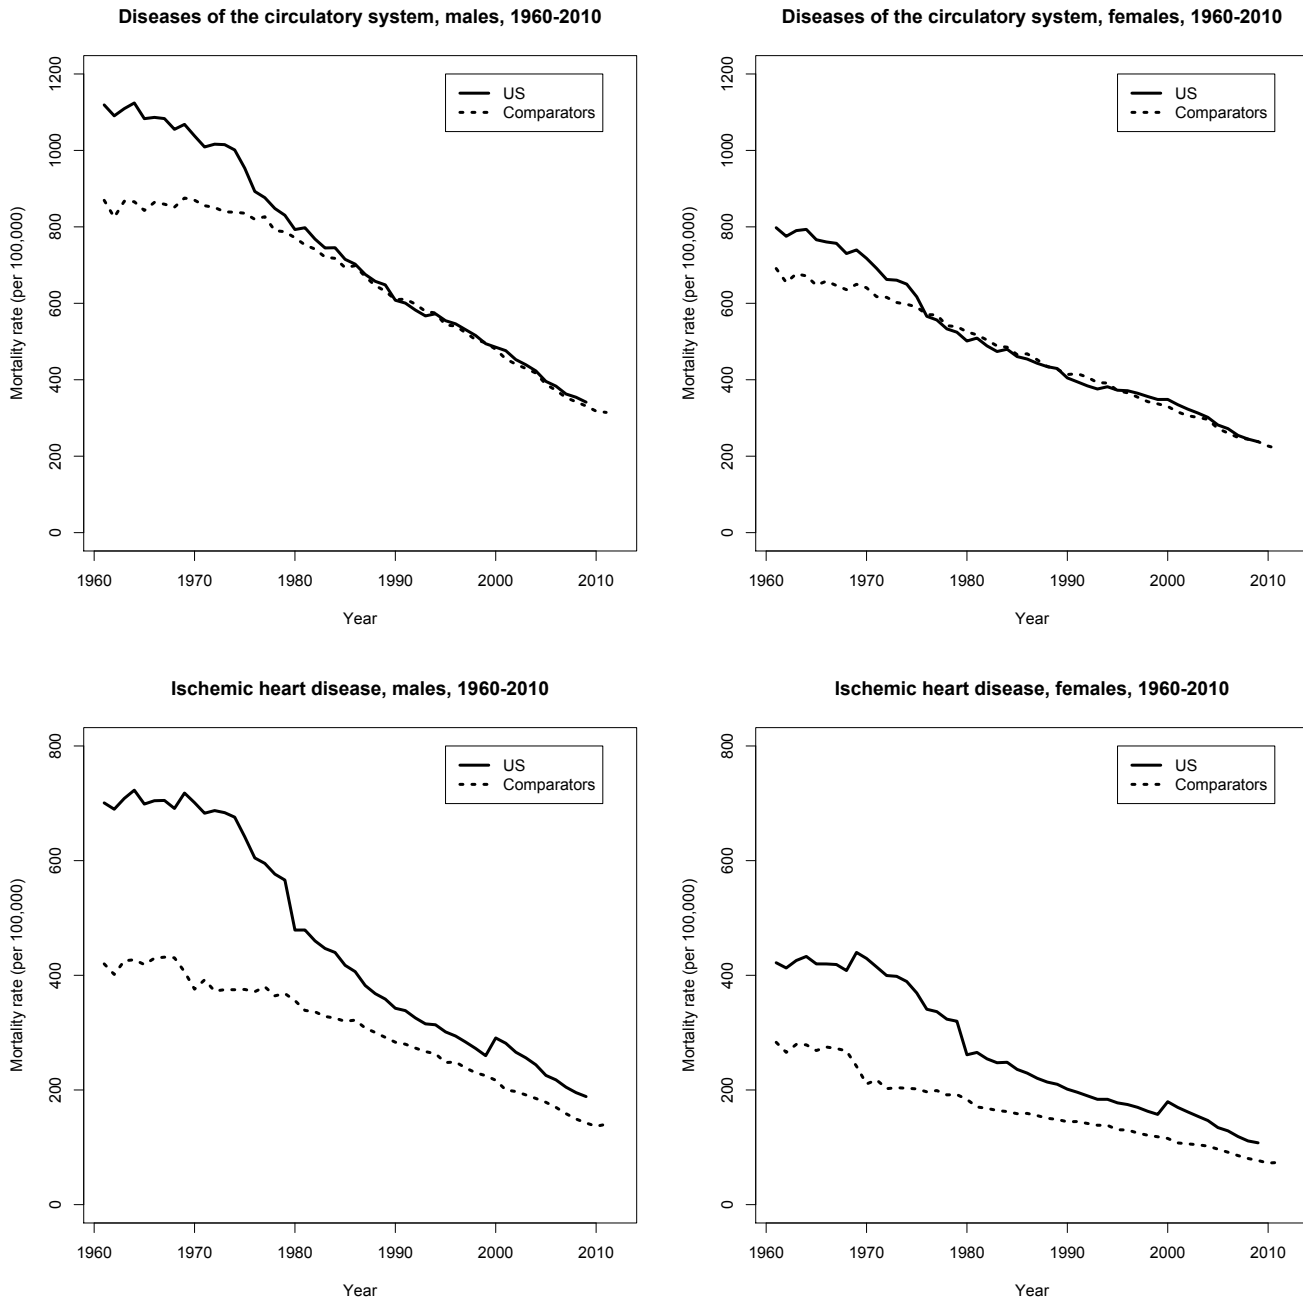

Source: Organisation for Economic Co-operation and Development.

Note: Diseases of the circulatory system include: acute rheumatic fever; chronic rheumatic heart diseases; hypertensive diseases; ischemic heart diseases; pulmonary heart disease and diseases of pulmonary circulation; other forms of heart disease; cerebrovascular diseases; diseases of arteries, arterioles, and capillaries; diseases of veins, lymphatic vessels and lymph nodes, not elsewhere classified; other unspecified diseases of the circulatory system.
